# Supplementary material
Source: Springer Nature journal article supplement (https://www.springermedizin.de/resource/supplementary/12891_2013_2121_MOESM5_ESM.docx/9509460)
Supplement: MOESM5 [file 9509460]

|  | N total | Average | SD | N below detection level |
| --- | --- | --- | --- | --- |
| MMP-13 [pg/ml] | 28 | 12.61 | 28.71 | 22 |
| IL-1β [pg/ml] | 28 | 9.24 | 5.31 | 1 |
| bFGF [pg/ml] | 28 | 50.97 | 153.9 | 12 |
| BMP-2 [pg/ml] | 28 | 99.77 | 83.65 | 7 |
| BMP-7 [pg/ml] | 28 | 40.98 | 47.88 | 1 |
| IGF-1 [pg/ml] | 28 | 318.76 | 187.04 | 3 |
| IGF-1R [pg/ml] | 28 | 360.64 | 459.70 | 7 |
| Endoglin [pg/ml] | 28 | 1164.3 | 697.49 | 0 |
| Aggrecan [pg/ml] | 28 | 28786 | 37474 | 0 |
| TPC [mg/ml] | 28 | 403.30 | 350.96 | 0 |

**Tab. 2:** Overview about the intraarticular protein concentrations, SD – standard deviation, MMP-13 - matrix metalloproteinase-13, IL-1β – interleukin-1β, bFGF – basic fibroblast growth factor, BMP-2 and BMP-7 - bone morphogenetic protein-2 and 7, IGF-1 - insulin-like growth factor 1, IGF-1R - insulin-like growth factor 1 receptor, TPC – total protein content
